# Supplementary material for: Clarin‐2 is essential for hearing by maintaining stereocilia integrity and function
Source: PubMed Central journal article supplement (PMC6728604; doi:10.15252/emmm.201910288), 2019-08-26
Supplement: EMMM-11-e10288-s001.pdf [file EMMM-11-e10288-s001.pdf]

## **Clarin-2 is essential for hearing by maintaining stereocilia integrity and function**

Lucy A Dunbar, Pranav Patni, Carlos Aguilar, Philomena Mburu, Laura Corns, Helena RR Wells, Sedigheh Delmaghani, Andrew Parker, Stuart Johnson, Debbie Williams, Christopher T Esapa, Michelle M Simon, Lauren Chessum, Sherylanne Newton, Joanne Dorning, Prashanthini Jeyarajan, Susan Morse, Andrea Lelli, Gemma F Codner, Thibault Peineau, Suhasini R Gopal, Kumar N Alagramam, Ronna Hertzano, Didier Dulon, Sara Wells, Frances M Williams, Christine Petit, Sally J Dawson, Steve DM Brown, Walter Marcotti, Aziz El-Amraoui, Michael R Bowl

## **APPENDIX**

Appendix Table S1

**Appendix Table S1: Exact *P*-values for ABR and DPOAE phenotyping.**

| Figure | Comparison                                                                  | Test  | Age | Stimulus          |                   |                   |                   |
|--------|-----------------------------------------------------------------------------|-------|-----|-------------------|-------------------|-------------------|-------------------|
|        |                                                                             |       |     | 8kHz              | 16kHz             | 32kHz             | Click             |
| Fig 1E | <i>Clrn2</i> <sup>clarinet/del629</sup><br>vs <i>Clrn2</i> <sup>+/+</sup>   | ABR   | P21 | 0.000000014762719 | 0.000000000502017 | 0.000000021428476 | 0.000000000002922 |
| Fig 2C | <i>Clrn2</i> <sup>clarinet/clarinet</sup><br>vs <i>Clrn2</i> <sup>+/+</sup> | ABR   | P16 | 0.000000036463579 | 0.000000000031308 | 0.00000004454557  | 0.000000431700296 |
| Fig 2D | <i>Clrn2</i> <sup>clarinet/clarinet</sup><br>vs <i>Clrn2</i> <sup>+/+</sup> | ABR   | P21 | 0.000000000026967 | 0.000000000001169 | 0.000000000000039 | 0.00000000002499  |
| Fig 2E | <i>Clrn2</i> <sup>clarinet/clarinet</sup><br>vs <i>Clrn2</i> <sup>+/+</sup> | ABR   | P28 | 0.000000000009665 | 0.000000000000036 | 0.000000000144136 | 0.000000000000039 |
| Fig 2F | <i>Clrn2</i> <sup>clarinet/clarinet</sup><br>vs <i>Clrn2</i> <sup>+/+</sup> | ABR   | P42 | 0.000000000000396 | 0.000000000000033 | 0.000000000024488 | 0.000000000000033 |
| Fig 2G | <i>Clrn2</i> <sup>clarinet/clarinet</sup><br>vs <i>Clrn2</i> <sup>+/+</sup> | DPOAE | P28 | 0.00111824530501  | 0.2266695510384   | 0.033988503001665 | -                 |
